# Supplementary material
Source: publisher figshare collection journal article supplement (https://karger.figshare.com/ndownloader/files/12727979)
Supplement: Supplementary file 1 [file 12727979]

**Supplementary Table S1**

| ***G. g. genetta*** | ***G. g. grantii*** | ***G. maculata*** |
| --- | --- | --- |
| 1 | 1 | 4+15p |
| 2 | 2 | 10q+12 |
| 3 | 3 | 1p+8q |
| 4 | 4 | 6q+9p |
| 5 | 5 | 7+22q |
| 6 | 6 | 3 |
| 7 | 7q+7p(pericentromeric region) | 13 |
| 8 | 8 | 5q+9q |
| 9 | 9 | 2 p+22p |
| 10 | 10 | 16 |
| 11 | 11 | 5p+18q |
| 12 | 12 | 11 |
| 13 | 13 | 14 |
| 14 | 14 | 17 |
| 15 | 15 | 8p+18p |
| 16 | 16 | 19 |
| 17 | 17 | 21 |
| 18 | 18 | 1q |
| 19 | 19 | 20 |
| 20 | 20 | 23 |
| 21 | 21 | 2q |
| 22 | 22 | 15q |
| 23 | 23 | 24 |
| 24 | 24 | 10p |
| 25 | 25 | 25 |
| 26 | 7p region | 6p |
